# Supplementary material
Source: PubMed Central journal article supplement (PMC4163916)
Supplement: NIHMS625661-supplement-Supplement.pdf [file NIHMS625661-supplement-Supplement.pdf]

## Supplementary Information

### Opioids induce dissociable forms of long-term depression of excitatory inputs to the dorsal striatum

Brady K. Atwood, David A. Kupferschmidt, and David M. Lovinger\*

Section on Synaptic Pharmacology, Laboratory for Integrative Neuroscience, National Institute on Alcohol Abuse and Alcoholism, US National Institutes of Health, Bethesda, Maryland, USA

\*Corresponding author:

NIAAA  
5625 Fishers Ln  
TS-13A  
Rockville, MD 20852  
Phone: 301-443-2445  
lovindav@mail.nih.gov

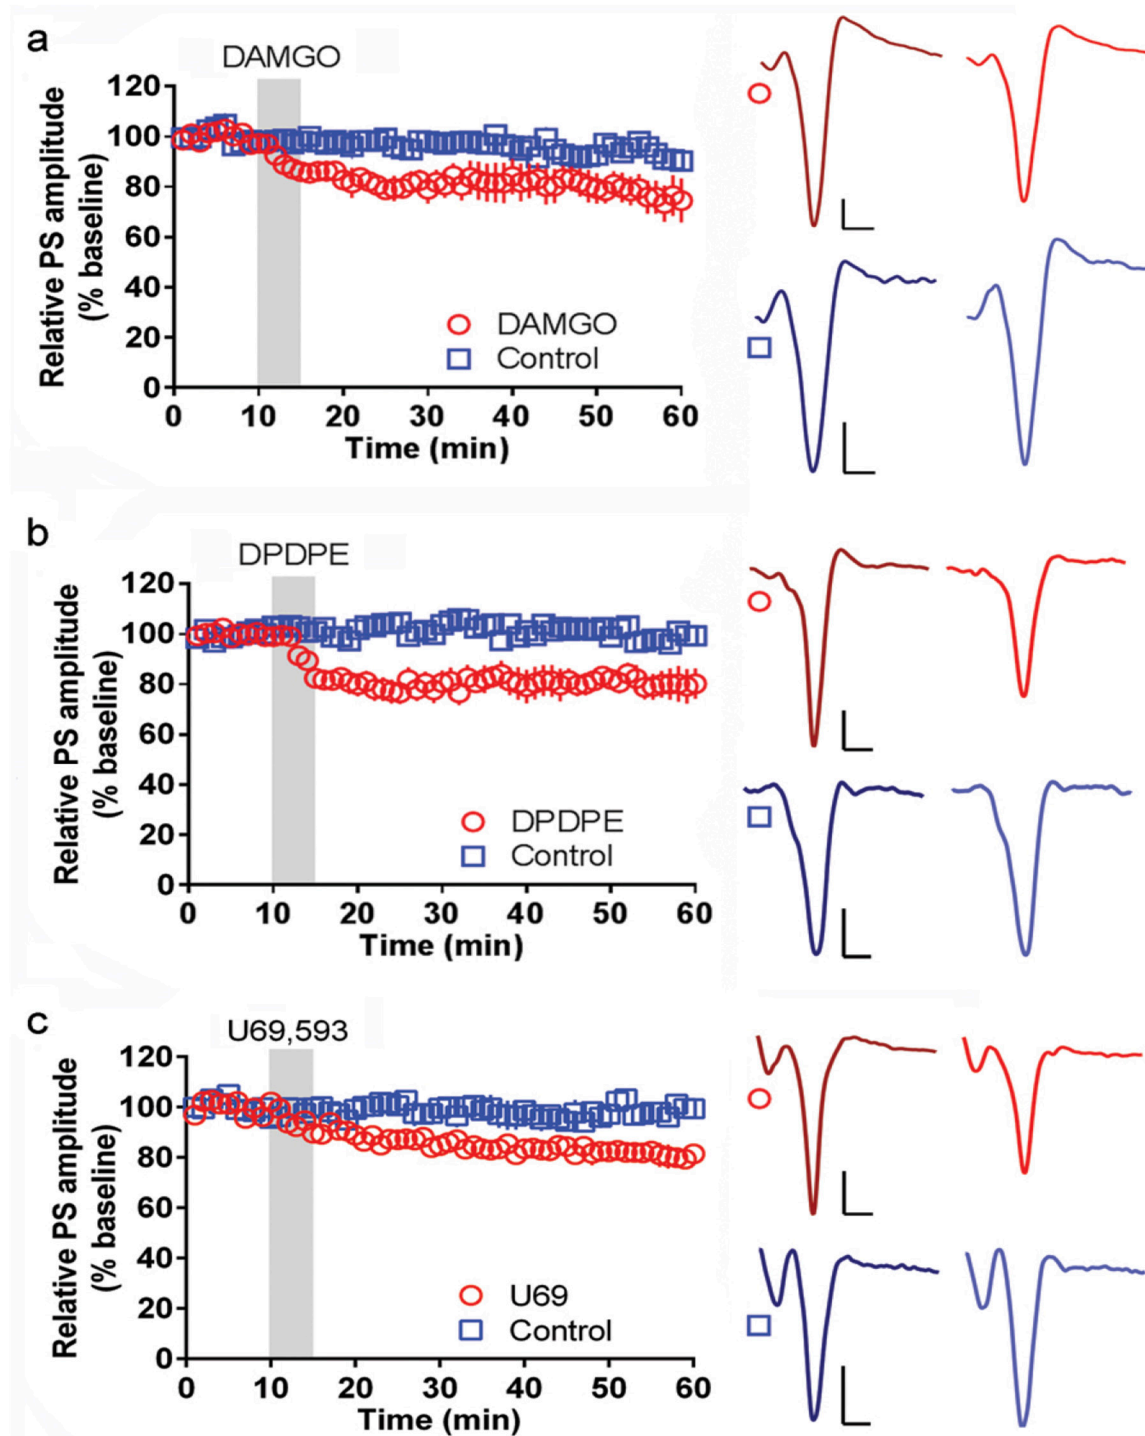

**Supplementary Figure 1: Field recordings reveal OP-LTD of net striatal output.**

(a) DAMGO (1  $\mu$ M, 5 min) induced mOP-LTD of population spike amplitude in field recordings of the DLS (vs. control:  $P=0.0219$ ,  $t(12)=2.631$ ,  $n=14$ ). (b) DPDPE (1  $\mu$ M, 5 min) induced dOP-LTD of population spike amplitude in field recordings of the DLS (vs. control:  $P=0.0047$ ,  $t(14)=3.360$ ,  $n=16$ ). (c) U69,593 (1  $\mu$ M, 5 min) induced kOP-LTD of population spike amplitude in field recordings of the DLS (vs. control:  $P=0.0317$ ,  $t(14)=2.386$ ,  $n=16$ ). Representative traces are the average of the first 5 min (first of each pair) and the final 5 min (second of each pair) of recording. Scale bars: 0.2 mV, 2 ms. Data analyzed with unpaired Student's t-test.

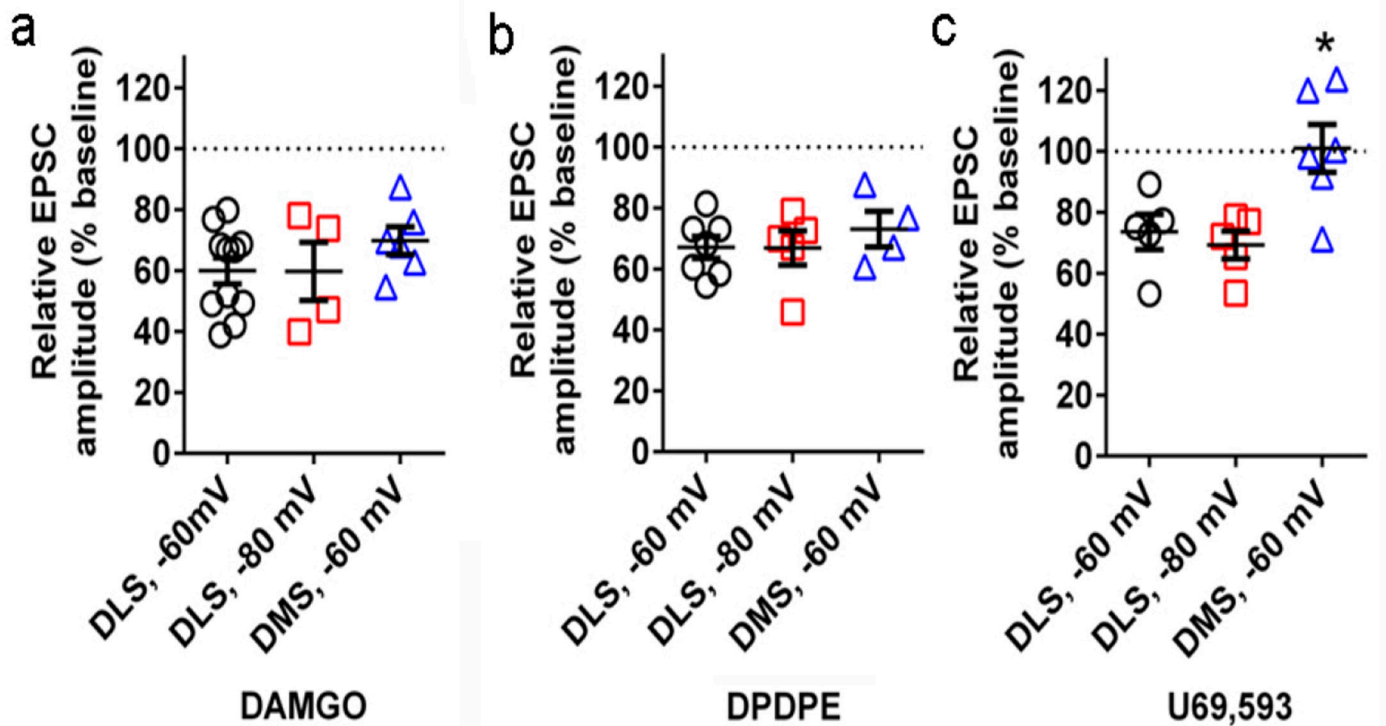

**Supplementary Figure 2: OP-LTD is equivalent at -60 mV and -80 mV holding potentials in DLS, but only mOP- and dOP-LTD occur in DMS.**

(a) DAMGO (1  $\mu$ M, 5 min) induced comparable mOP-LTD in MSNs recorded at -60 mV (n=11) and -80 mV in DLS (n=4), and at -60 mV in DMS (n=6) (at 25 min:  $P=0.3741$ ,  $F_{(2,18)}=1.039$ ). (b) DPDPE (1  $\mu$ M, 5 min) induced comparable dOP-LTD in MSNs recorded at -60 mV (n=7) and -80 mV in DLS (n=5), and at -60 mV in DMS (n=4) (at 25 min:  $P=0.6461$ ,  $F_{(2,13)}=0.4518$ ). (c) U69,593 (0.3  $\mu$ M, 5 min) induced comparable kOP-LTD in MSNs recorded at -60 mV (n=5) and -80 mV in DLS (n=5). U69,593 failed to induce LTD in DMS (n=6) (at 25 min:  $P=0.0075$ ,  $F_{(2,13)}=7.308$ ). Data analyzed with a one-way ANOVA with Dunnett's multiple comparisons post-test: vs. DLS, -60 mV. \*:  $P<0.05$ .

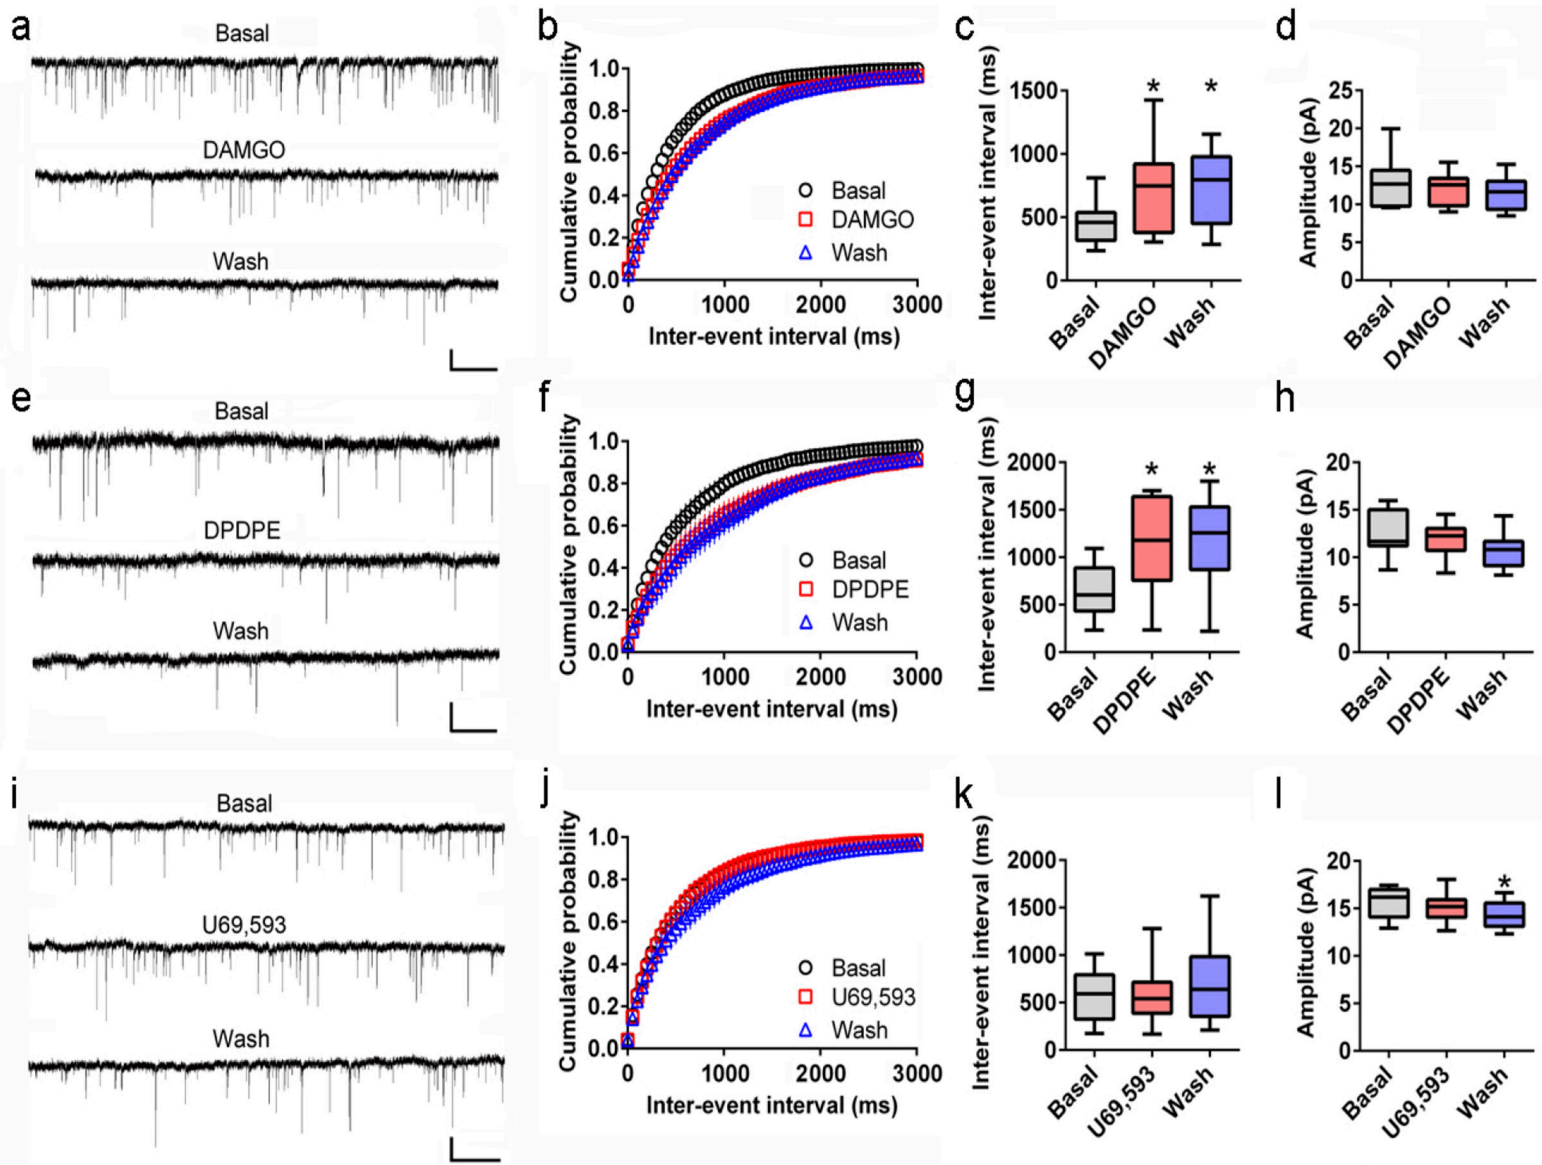

**Supplementary Figure 3: mOP- and dOP-LTD are expressed presynaptically, whereas KOP-LTD has an unclear site of expression.**

(a) Representative traces of sEPSCs recorded from a DLS MSN before, immediately after, and 20-25 min following DAMGO (0.3  $\mu$ M, 5 min). DAMGO (0.3  $\mu$ M, 5 min) induced a long-lasting increase in sEPSC inter-event interval (IEI) (b,c;  $P=0.0063$ , Friedman statistic=9.800,  $n=9$ ) with no change in sEPSC amplitude (d;  $P=0.2223$ , Friedman statistic=3.200). (e) Representative sEPSC traces for DPDPE (0.3  $\mu$ M, 5 min). DPDPE (0.3  $\mu$ M, 5 min) produced a long-lasting increase in sEPSC IEI (f,g;  $P=0.0207$ , Friedman statistic=7.714,  $n=7$ ) with no change in sEPSC amplitude (h;  $P=0.0854$ , Friedman statistic=5.429). (i) Representative sEPSC traces for U69,593 (0.3  $\mu$ M, 5 min). U69,593 (0.3  $\mu$ M, 5 min) produced no change in sEPSC IEI (j,k;  $P=0.0570$ , Friedman statistic=6.000,  $n=9$ ), but produced a delayed decrease in sEPSC amplitude (l;  $P=0.0307$ , Friedman statistic=6.889). Scale bars: 20 pA, 2 s. Data in c-d, g-h, and k-l analyzed with Friedman test with Dunn's multiple comparisons post-test. \*:  $P<0.05$ .

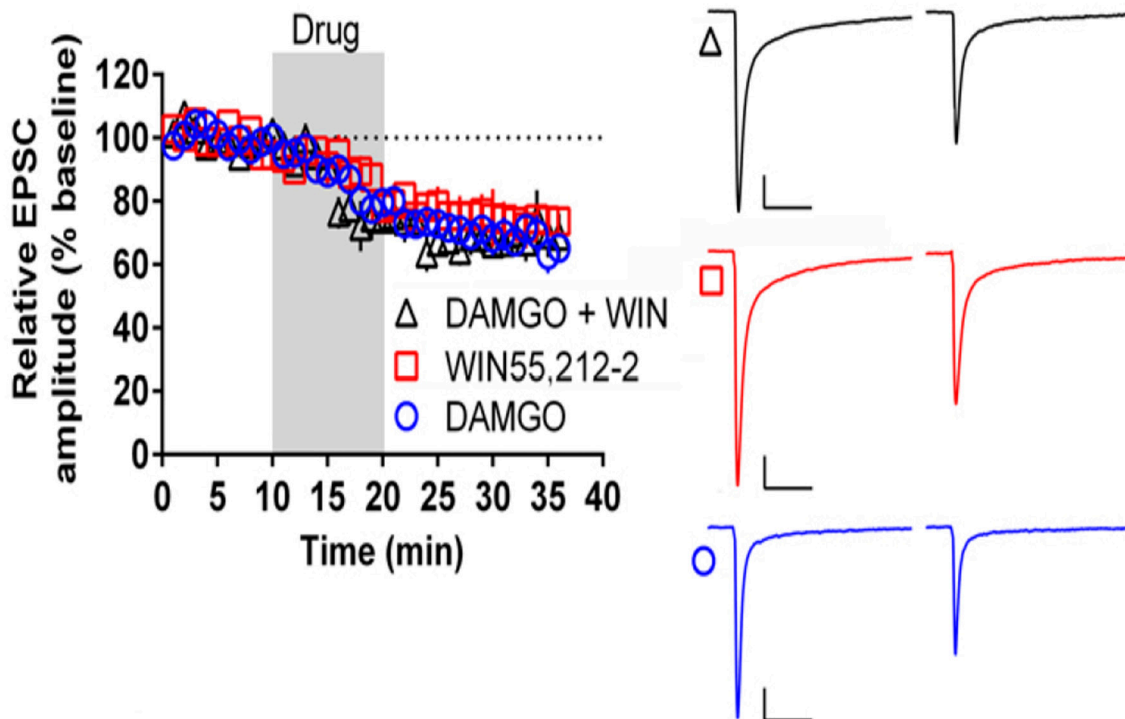

**Supplementary Figure 4: The lack of an additive effect of a MOPr and a CB<sub>1</sub> agonist suggests a presynaptically localized occlusiveness of mOP-LTD and CB<sub>1</sub>-LTD.**

DAMGO (0.3  $\mu$ M; n=5), WIN55,212-2 (1  $\mu$ M, n=5), or their combination (n=6), each applied for 10 min, induced comparable magnitudes of depression ( $P=0.7797$ ,  $F_{(2,13)}=0.2537$ ).

Representative traces are the average of the first 10 min (first of pair) and the final 10 min (second of pair) of recording. Scale bars: 50 pA, 50 ms. Data analyzed with one-way ANOVA with Tukey's post-test.

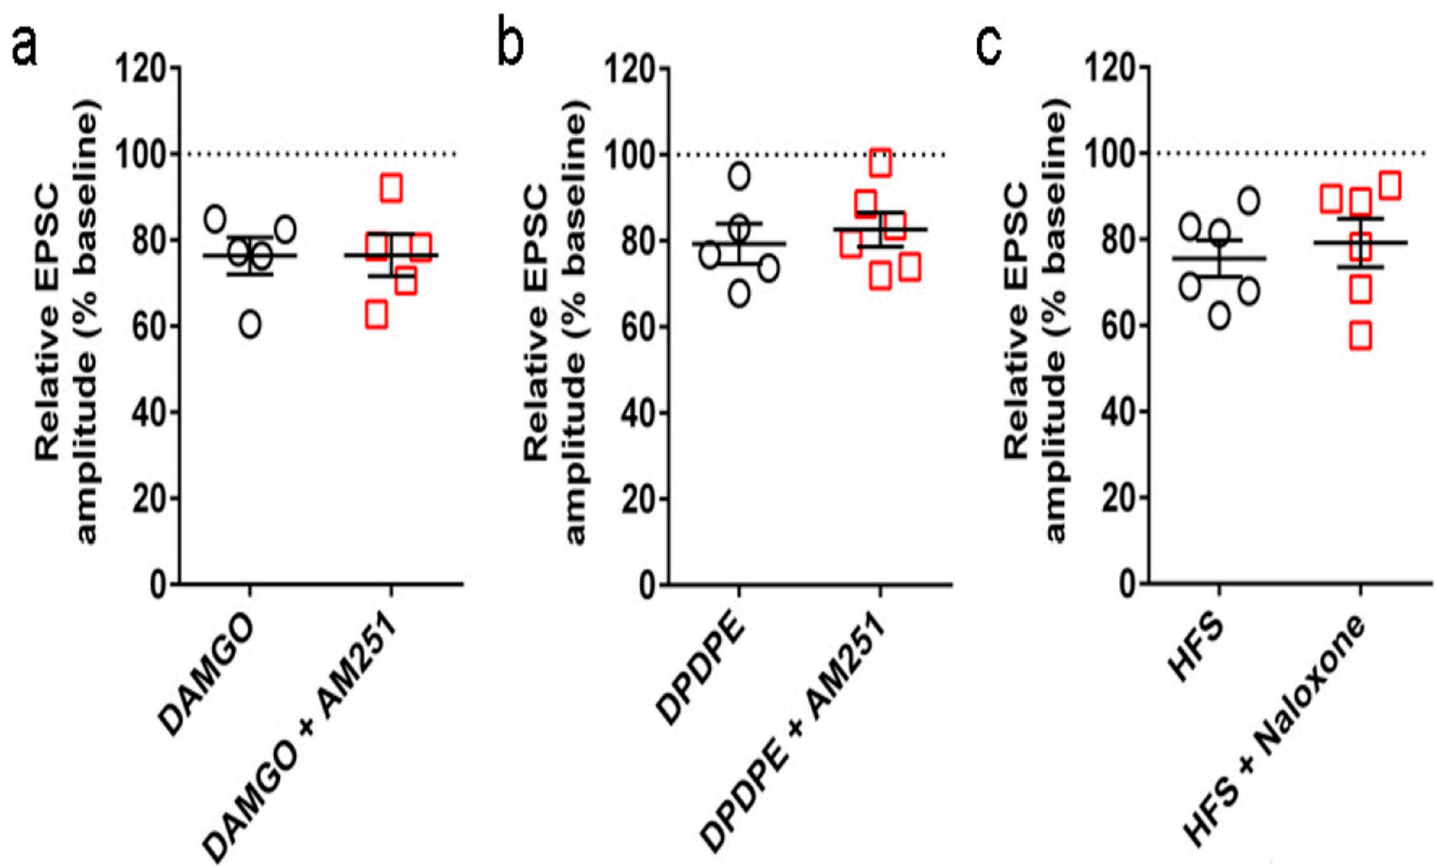

**Supplementary Figure 5: eCB-LTD is not blocked by opioid receptor antagonists, and OP-LTD is not blocked by a CB<sub>1</sub> antagonist.**

(a) Pre-application of the CB<sub>1</sub> receptor antagonist, AM251 (3 μM), did not alter mOP-LTD induced by DAMGO (0.3 μM to 1 μM, 5 min; at 30 min:  $P=0.9836$ ,  $t(8)=0.02127$ ,  $n=5$  each). (b) Pre-application of AM251 (3 μM) did not alter dOP-LTD induced by DPDPE (0.3 μM to 1 μM, 5 min; at 30 min:  $P=0.5996$ ;  $t(9)=0.5441$ ,  $n=5$  control,  $n=6$  AM251). (c) Pre-application of the opioid receptor antagonist, naloxone (2 μM), did not alter eCB-LTD induced by HFS paired with postsynaptic depolarization (at 30 min:  $P=0.6162$ ,  $t(10)=0.5173$ ,  $n=6$  each). Data analyzed with unpaired Student's t-test.

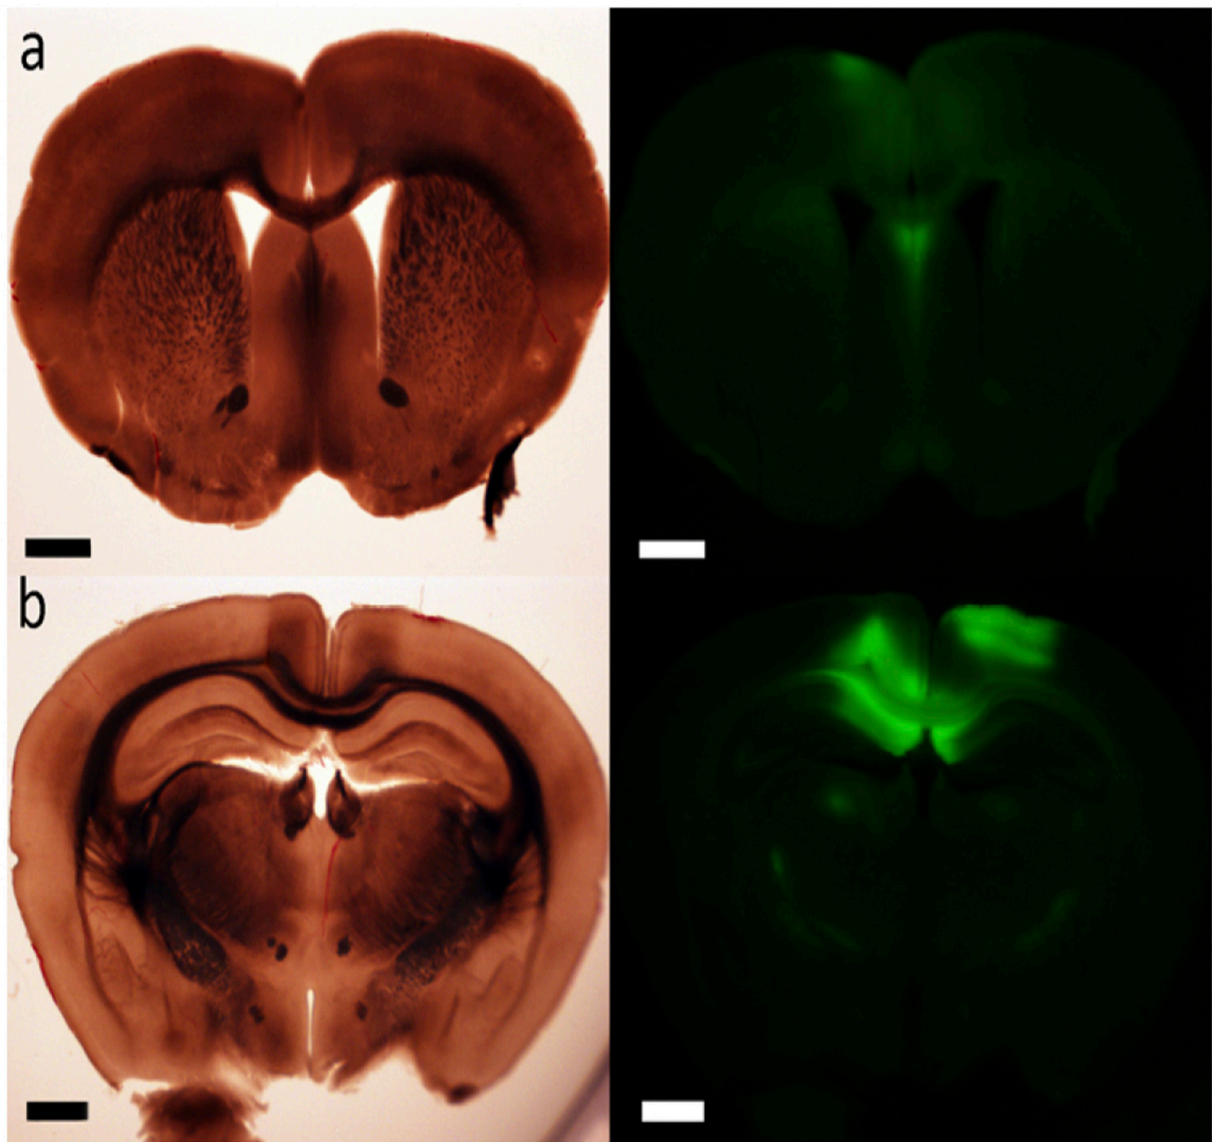

**Supplementary Figure 6: Expression of ChR2-Venus in hippocampus does not result in striatal ChR2-Venus expression**

(a) Lack of striatal expression of ChR2-Venus in striatum following an injection of AAV vector in hippocampus. Injection coordinates: A/P: -2.0, M/L:  $\pm$  0.35, D/V: -1.45. (b) AAV vector injection in hippocampus produces substantial ChR2-Venus expression at the injection site. Images are representative of 1 injected mouse. Scale bars: 1 mm.
